# Supplementary material for: Genotype-specific transcriptomic response to drought stress in potato cultivars modulated by microbial biostimulants
Source: Research Square preprint supplement (doi:10.21203/rs.3.rs-7656066/v1), 2025-10-23
Supplement: Supplementary file 1 [file 01eaef42c52c50e70d0fae89.pdf]

**Additional file 2.** Primer sequences and qRT-PCR conditions.

|                                                 | <b>Forward</b>           | <b>Reverse</b>           |
|-------------------------------------------------|--------------------------|--------------------------|
| <b>18S</b>                                      | TAGATAAAAGGTCTGACGCGG    | CCCAAAGTCCAACTACGAGC     |
| <b>PSII-W</b><br><b>PGSC0003DMG400020141</b>    | GGATGAAAGAATGAGCACAGAAGG | AGACCAAACCAAACCGAAGACT   |
| <b>PSAK</b><br><b>PGSC0003DMG400020505</b>      | TTGTTTGCTGGTAGATTGCGG    | GGTCCCCTGTCTGTAAGCC      |
| <b>PSII 5kDa</b><br><b>PGSC0003DMG400010498</b> | ACGTCATCTCCATTTCTAGTCCA  | TCTTATTGCTTTTTGAATGCGTGG |
| <b>HSP70</b><br><b>PGSC0003DMG400030089</b>     | GACGAGAAAGCAGCAGAAGAC    | CCATGCACACACTAATCTCTGG   |
| <b>PSI-H</b><br><b>PGSC0003DMG400016504</b>     | TCACCCTACAACTCCCTTCAGA   | AGCCACCTCCCAATATCAAGA    |
| <b>EF-1<math>\alpha</math></b>                  | ATTGGAAACGGATATGCTCCA    | TCCTTACCTGAACGCCTGTCA    |

18S rRNA gene was used in RT-PCR analysis (standard conditions, Temperature of annealing = 52°C) to control quality of cDNA before qRT-PCR.

qRT-PCR program cycle parameters were set as follows: 50°C for 2 min (stage 1), 95°C for 10 min (stage 2), 95°C for 15 sec and 60°C for 1 min (stage 3 repeated 40 times), 95°C for 15 sec, 60°C for 15 sec and 95°C for 15 sec (stage 4). Melting curve analysis was performed to check specificity of the reactions. The relative expression levels were calculated using the  $2^{-\Delta\Delta CT}$  method (Livak and Schmittgen, 2001). EF-1 $\alpha$  was used as internal control. Data representing three biological replicates and three technical replicates are expressed as mean  $\pm$  standard deviation.

**Reference**

Livak KJ, Schmittgen TD. Analysis of relative gene expression data using real-time quantitative PCR and the  $2^{-\Delta\Delta CT}$  method. *Methods*. 2001;25:402-8.
