# Supplementary material for: Genotype-specific transcriptomic response to drought stress in potato cultivars modulated by microbial biostimulants
Source: Research Square preprint supplement (doi:10.21203/rs.3.rs-7656066/v1), 2025-10-23
Supplement: Supplementary file 3 [file 9e48d8f3e29305483b8fbf48.pdf]

A

Ethylene &amp; ABA signaling

UDP-glucose transmembrane transport  
 UDP-galactose transmembrane transport

↑ Osmoregulation & transport

↑ Photosynthesis

ROS

Cp

↑ Chromatin remodelling

Nc

NO

Response to stress

Protein folding & catabolism

↑ Nutrient assimilation

Vc

Defense & oxidative stress (glutathione)

Mt

B

↑ Circadian rhythm

Cell wall biogenesis

Transmembrane transport

↑ Osmoregulation

Photosynthesis

ROS

Cp

↑ Response to stress

Nc

↑ Sugar metabolism

Px

Nutrient assimilation

Vc

Primary metabolism  
 (carbohydrates, lipids,  
 starch, pigments, amines)

Mt
