# Supplementary figures and images for: Genotype-specific transcriptomic response to drought stress in potato cultivars modulated by microbial biostimulants
Source: Research Square preprint supplement (doi:10.21203/rs.3.rs-7656066/v1), 2025-10-23

A

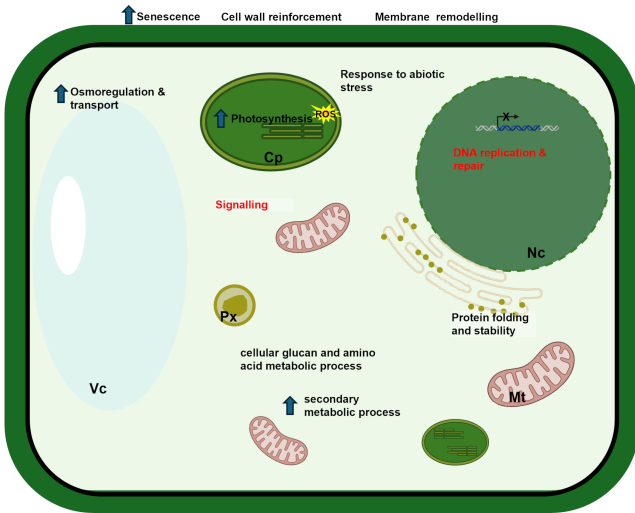

B

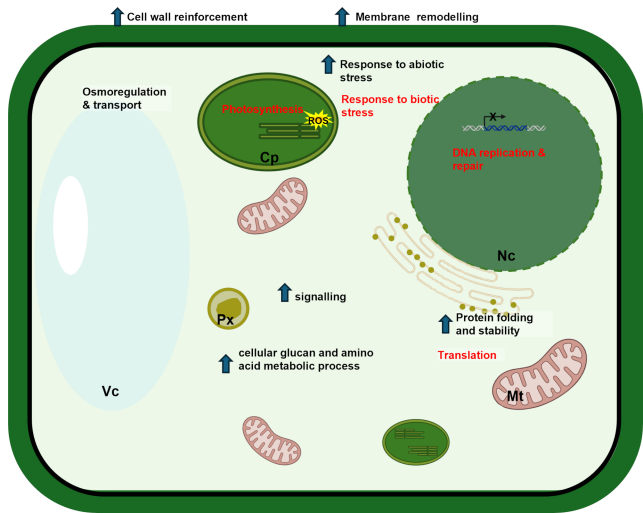

Supplement: Supplementary file 2 [file 64a74857987ac07fe52deb96.pdf]
